# Supplementary material for: Pigs’ capacity to experience feelings and to suffer from tail lesion, ear lesion and lameness: Exploring citizens and pig farm and abattoir workers’ knowledge and perceptions
Source: PubMed Central journal article supplement (PMC10212169; doi:10.1371/journal.pone.0286188), 2023-05-25
Supplement: pone.0286188.s001.pdf [file pone.0286188.s001.pdf]

4. On a scale of 0 to 4, mark to what extent do you think the following injuries/conditions AFFECT THE TASTE, SMELL, COLOUR AND/OR APPEARANCE OF PIG MEAT OR ITS BY-PRODUCTS. ( Mark only **one option** for each injury/condition )

|              |                       |                       |                       |                       |                       |        |  |                       |
|--------------|-----------------------|-----------------------|-----------------------|-----------------------|-----------------------|--------|--|-----------------------|
|              | Unlikely              |                       |                       |                       |                       | likely |  |                       |
|              | 0                     | 1                     | 2                     | 3                     | 4                     |        |  | I don't know          |
| Tail lesions | <input type="radio"/> | <input type="radio"/> | <input type="radio"/> | <input type="radio"/> | <input type="radio"/> |        |  | <input type="radio"/> |
| Ear lesions  | <input type="radio"/> | <input type="radio"/> | <input type="radio"/> | <input type="radio"/> | <input type="radio"/> |        |  | <input type="radio"/> |
| Lameness     | <input type="radio"/> | <input type="radio"/> | <input type="radio"/> | <input type="radio"/> | <input type="radio"/> |        |  | <input type="radio"/> |

5. Working place where you carry out your duties:

- |                                                     |                                                     |
|-----------------------------------------------------|-----------------------------------------------------|
| <input type="radio"/> Pens and/or unloading         | <input type="radio"/> Administration/office         |
| <input type="radio"/> Finishing pig slaughter       | <input type="radio"/> Laboratory                    |
| <input type="radio"/> Sow slaughter                 | <input type="radio"/> Other, please indicate below: |
| <input type="radio"/> Deboning                      | _____                                               |
| <input type="radio"/> Transportation – truck driver |                                                     |

6. Sex

- Male  
 Female

7. Age

- 18-25  
 26-35  
 36-45  
 46-55  
 over 56 years old

8. Education level

- Up to high school  
 Higher education – completed or on-going

9. Do you have any kind of relationship with pig farming? ? (Mark **only one option**)

- Not involved**  
 **Currently not**, but I grew up in an environment related to pig production  
 Yes, I am professionally involved in the pig industry (rural producer, student, academic, etc)

10. What kind of animal products do you consume?

- |                                    |                                                        |
|------------------------------------|--------------------------------------------------------|
| <input type="radio"/> Pork         | <input type="radio"/> Milk and its by-products         |
| <input type="radio"/> Beef         | <input type="radio"/> Eggs                             |
| <input type="radio"/> Poultry meat | <input type="radio"/> Sausages (salami, chorizo, etc.) |
| <input type="radio"/> Fish         | <input type="radio"/> None                             |

*Thank you for supporting our research!*
