# Supplementary material for: Pigs’ capacity to experience feelings and to suffer from tail lesion, ear lesion and lameness: Exploring citizens and pig farm and abattoir workers’ knowledge and perceptions
Source: PubMed Central journal article supplement (PMC10212169; doi:10.1371/journal.pone.0286188), 2023-05-25
Supplement: pone.0286188.s002.pdf [file pone.0286188.s002.pdf]

**3. On a scale of 0 to 4, how much do you agree that pigs are able to feel the following feelings?**

|           | Completely disagree   |                       |                       | Completely agree      |                       |                       |
|-----------|-----------------------|-----------------------|-----------------------|-----------------------|-----------------------|-----------------------|
|           | 0                     | 1                     | 2                     | 3                     | 4                     | I don't know          |
| Pain      | <input type="radio"/> | <input type="radio"/> | <input type="radio"/> | <input type="radio"/> | <input type="radio"/> | <input type="radio"/> |
| Fear      | <input type="radio"/> | <input type="radio"/> | <input type="radio"/> | <input type="radio"/> | <input type="radio"/> | <input type="radio"/> |
| Happiness | <input type="radio"/> | <input type="radio"/> | <input type="radio"/> | <input type="radio"/> | <input type="radio"/> | <input type="radio"/> |
| Anxiety   | <input type="radio"/> | <input type="radio"/> | <input type="radio"/> | <input type="radio"/> | <input type="radio"/> | <input type="radio"/> |
| Boredom   | <input type="radio"/> | <input type="radio"/> | <input type="radio"/> | <input type="radio"/> | <input type="radio"/> | <input type="radio"/> |

**4. On a scale of 0 to 4, how much do you agree with the following attributes when talking about pigs?**

|             | Completely disagree   |                       |                       | Completely agree      |                       |                       |
|-------------|-----------------------|-----------------------|-----------------------|-----------------------|-----------------------|-----------------------|
|             | 0                     | 1                     | 2                     | 3                     | 4                     | I don't know          |
| Intelligent | <input type="radio"/> | <input type="radio"/> | <input type="radio"/> | <input type="radio"/> | <input type="radio"/> | <input type="radio"/> |
| Gluttonous  | <input type="radio"/> | <input type="radio"/> | <input type="radio"/> | <input type="radio"/> | <input type="radio"/> | <input type="radio"/> |
| Friendly    | <input type="radio"/> | <input type="radio"/> | <input type="radio"/> | <input type="radio"/> | <input type="radio"/> | <input type="radio"/> |
| Stubborn    | <input type="radio"/> | <input type="radio"/> | <input type="radio"/> | <input type="radio"/> | <input type="radio"/> | <input type="radio"/> |
| Dirty       | <input type="radio"/> | <input type="radio"/> | <input type="radio"/> | <input type="radio"/> | <input type="radio"/> | <input type="radio"/> |

**5. Working place where you carry out your duties:**

- |                                                     |                                                     |
|-----------------------------------------------------|-----------------------------------------------------|
| <input type="radio"/> Pens and/or unloading         | <input type="radio"/> Administration/office         |
| <input type="radio"/> Finishing pig slaughter       | <input type="radio"/> Laboratory                    |
| <input type="radio"/> Sow slaughter                 | <input type="radio"/> Other, please indicate below: |
| <input type="radio"/> Deboning                      | _____                                               |
| <input type="radio"/> Transportation – truck driver |                                                     |

**6. Sex**

- Male
- Female

**7. Age**

- 18-25
- 26-35
- 36-45
- 46-55
- over 56 years old

**8. Education level**

- Up to high school
- Higher education – completed or on-going

*Thank you for supporting our research!*
